# Supplementary material for: Deciphering the binding behavior of flavonoids to the cyclin dependent kinase 6/cyclin D complex
Source: PubMed Central journal article supplement (PMC5929560; doi:10.1371/journal.pone.0196651), 2018-05-01
Supplement: pone.0196651.s002.pdf [file pone.0196651.s002.pdf]

**S1 Table. The H-bonds formed between M16 and CDK6/cyclin D during the MD simulation.**

| Donor           | Acceptor        | Occupancy | Donor           | Acceptor      | Occupancy |
|-----------------|-----------------|-----------|-----------------|---------------|-----------|
| M15-Side-O20    | GLU61-Side-OE2  | 88.76%    | ILE19-Side-CD   | M15-Side-C8   | 0.40%     |
| M15-Side-O18    | GLU61-Side-OE2  | 86.81%    | M15-Side-O22    | ILE19-Main-C  | 0.35%     |
| VAL101-Main-N   | M15-Side-O2     | 65.42%    | LEU65-Side-CD2  | M15-Side-O20  | 0.35%     |
| M15-Side-O22    | ASP104-Side-OD1 | 28.14%    | ALA41-Side-CB   | M15-Side-O2   | 0.30%     |
| M15-Side-O20    | GLU61-Side-CD   | 25.39%    | LYS43-Side-NZ   | M15-Side-C14  | 0.25%     |
| M15-Side-O18    | GLU61-Side-CD   | 13.29%    | ASP163-Main-N   | M15-Side-O18  | 0.25%     |
| M15-Side-C8     | VAL101-Main-O   | 11.69%    | ASP163-Main-N   | M15-Side-C14  | 0.20%     |
| M15-Side-O22    | ASP104-Side-OD2 | 9.05%     | GLY20-Main-CA   | M15-Side-O22  | 0.20%     |
| ASP163-Main-N   | M15-Side-C15    | 7.65%     | M15-Side-C17    | GLU99-Main-O  | 0.15%     |
| HIS100-Main-CA  | M15-Side-O2     | 6.40%     | ASP104-Side-CB  | M15-Side-O22  | 0.15%     |
| M15-Side-O22    | ILE19-Main-O    | 6.30%     | ALA162-Side-CB  | M15-Side-C17  | 0.15%     |
| LYS43-Side-NZ   | M15-Side-O18    | 5.75%     | ASP163-Side-CB  | M15-Side-O18  | 0.10%     |
| M15-Side-O20    | GLU61-Side-OE1  | 5.20%     | VAL77-Side-CG2  | M15-Side-C17  | 0.10%     |
| M15-Side-O18    | GLU61-Side-OE1  | 4.65%     | LEU152-Side-CD1 | M15-Side-C4   | 0.10%     |
| M15-Side-O22    | ASP104-Side-CG  | 4.15%     | ILE19-Side-CD   | M15-Side-C5   | 0.05%     |
| ASP163-Main-N   | M15-Side-O20    | 4.05%     | LYS29-Side-CE   | M15-Side-O2   | 0.05%     |
| LEU65-Side-CD1  | M15-Side-O20    | 3.40%     | ILE19-Side-CD   | M15-Side-C3   | 0.05%     |
| M15-Side-C7     | GLU99-Main-O    | 2.55%     | LEU152-Side-CD1 | M15-Side-C3   | 0.05%     |
| GLN149-Side-NE2 | M15-Side-O22    | 1.85%     | VAL27-Side-CG1  | M15-Side-C9   | 0.05%     |
| ASP163-Main-CA  | M15-Side-O18    | 1.40%     | ILE19-Side-CD   | M15-Side-C11  | 0.05%     |
| HIS100-Side-CD2 | M15-Side-O2     | 1.25%     | M15-Side-O20    | PHE98-Side-CZ | 0.05%     |
| ASP163-Main-N   | M15-Side-C16    | 1.10%     | LEU152-Side-CD1 | M15-Side-O1   | 0.05%     |
| VAL27-Side-CG1  | M15-Side-O1     | 0.75%     | ASP163-Main-CA  | M15-Side-O20  | 0.05%     |
| PHE164-Main-N   | M15-Side-O20    | 0.55%     |                 |               |           |
